# Supplementary material for: TRPM7 silencing modulates glucose metabolic reprogramming to inhibit the growth of ovarian cancer by enhancing AMPK activation to promote HIF-1α degradation
Source: PubMed Central journal article supplement (PMC8802454; doi:10.1186/s13046-022-02252-1), 2022-01-31
Supplement: 13046_2022_2252_MOESM5_ESM.pdf [file 13046_2022_2252_MOESM5_ESM.pdf]

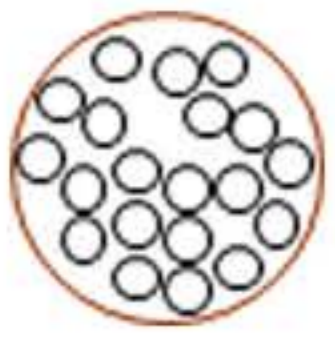

**Sh-Control SKOV3**

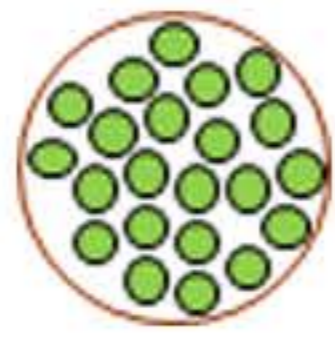

**Sh-TRPM7 SKOV3**

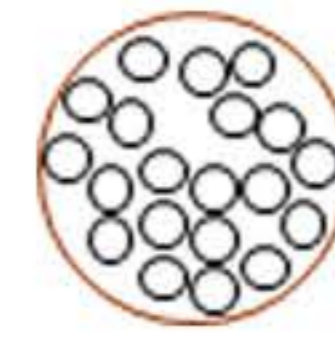

**SKOV3**

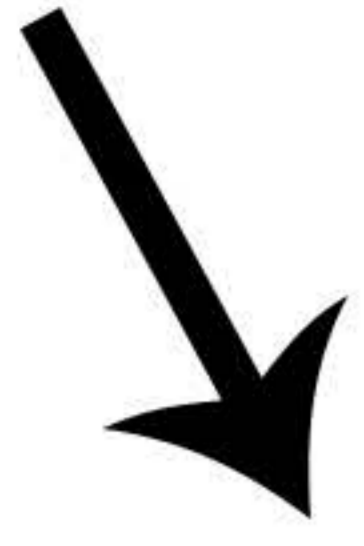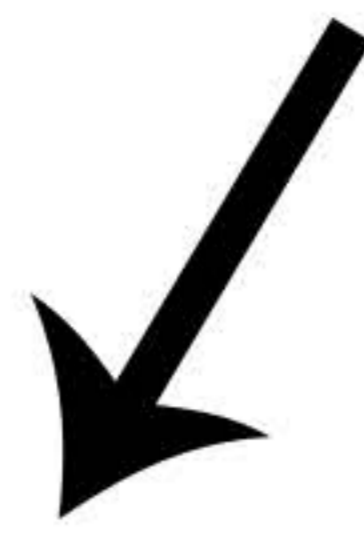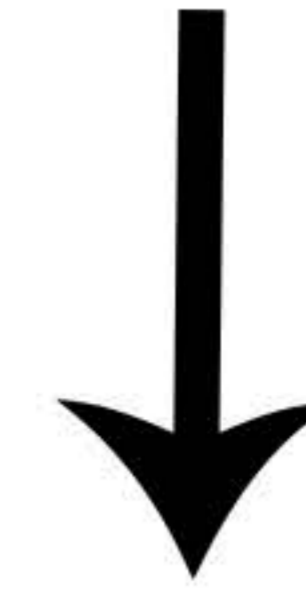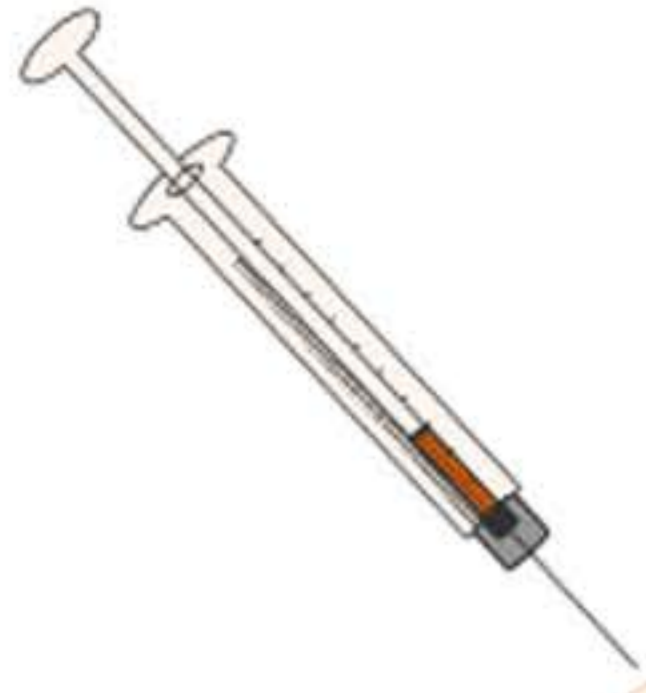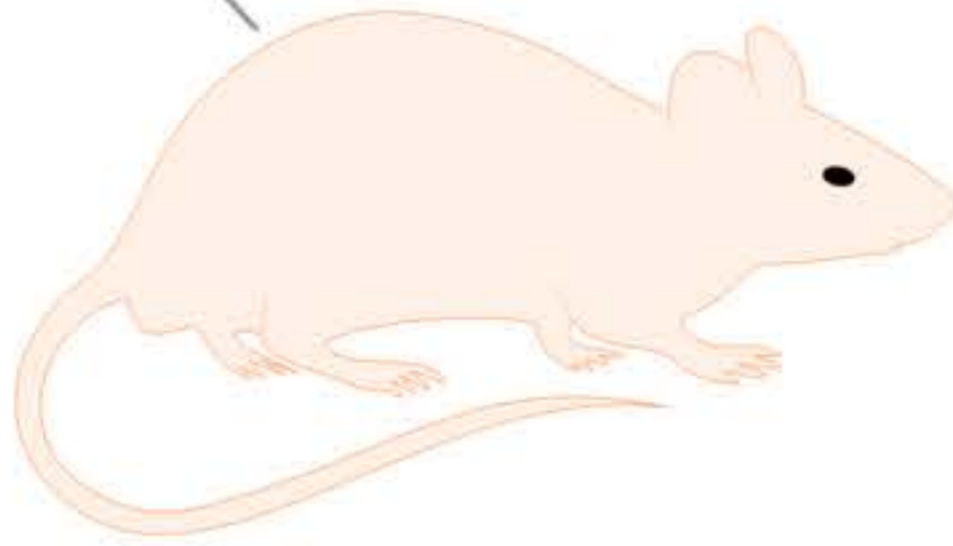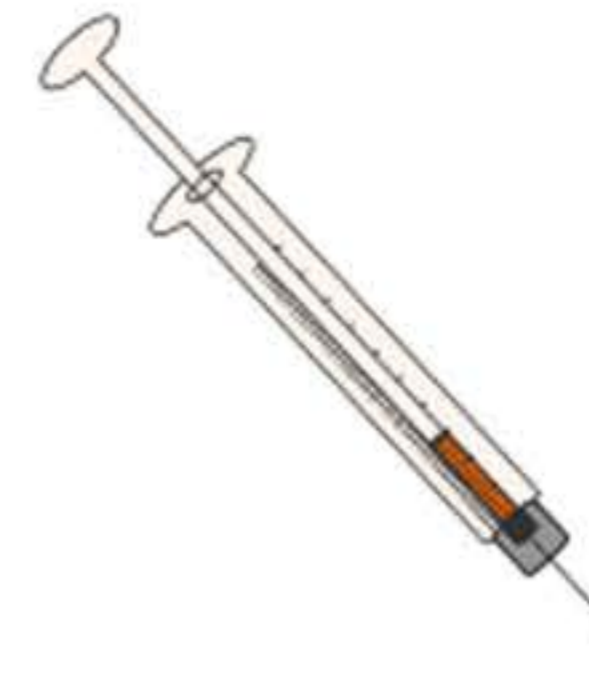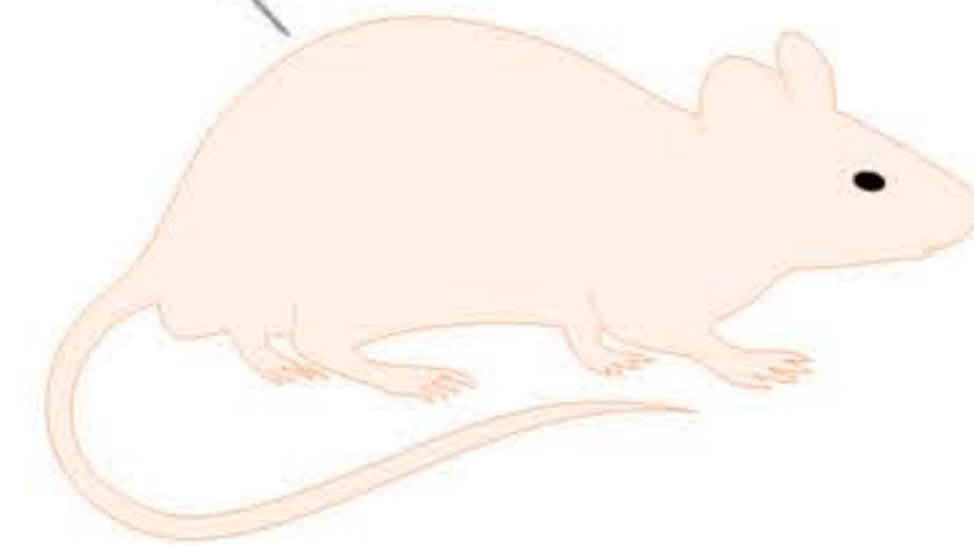

**4 Weeks**

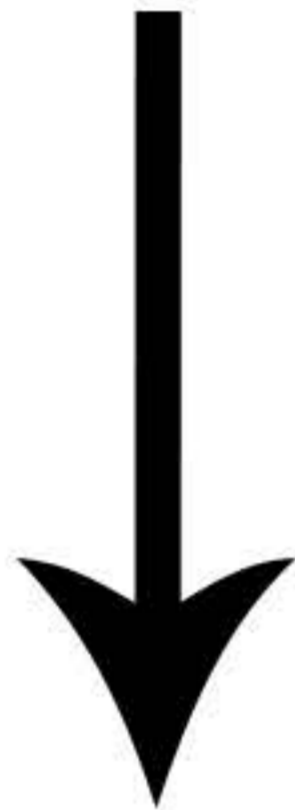

**Dissected, weighed  
and photoimaged  
the tumors**

**3 Weeks**

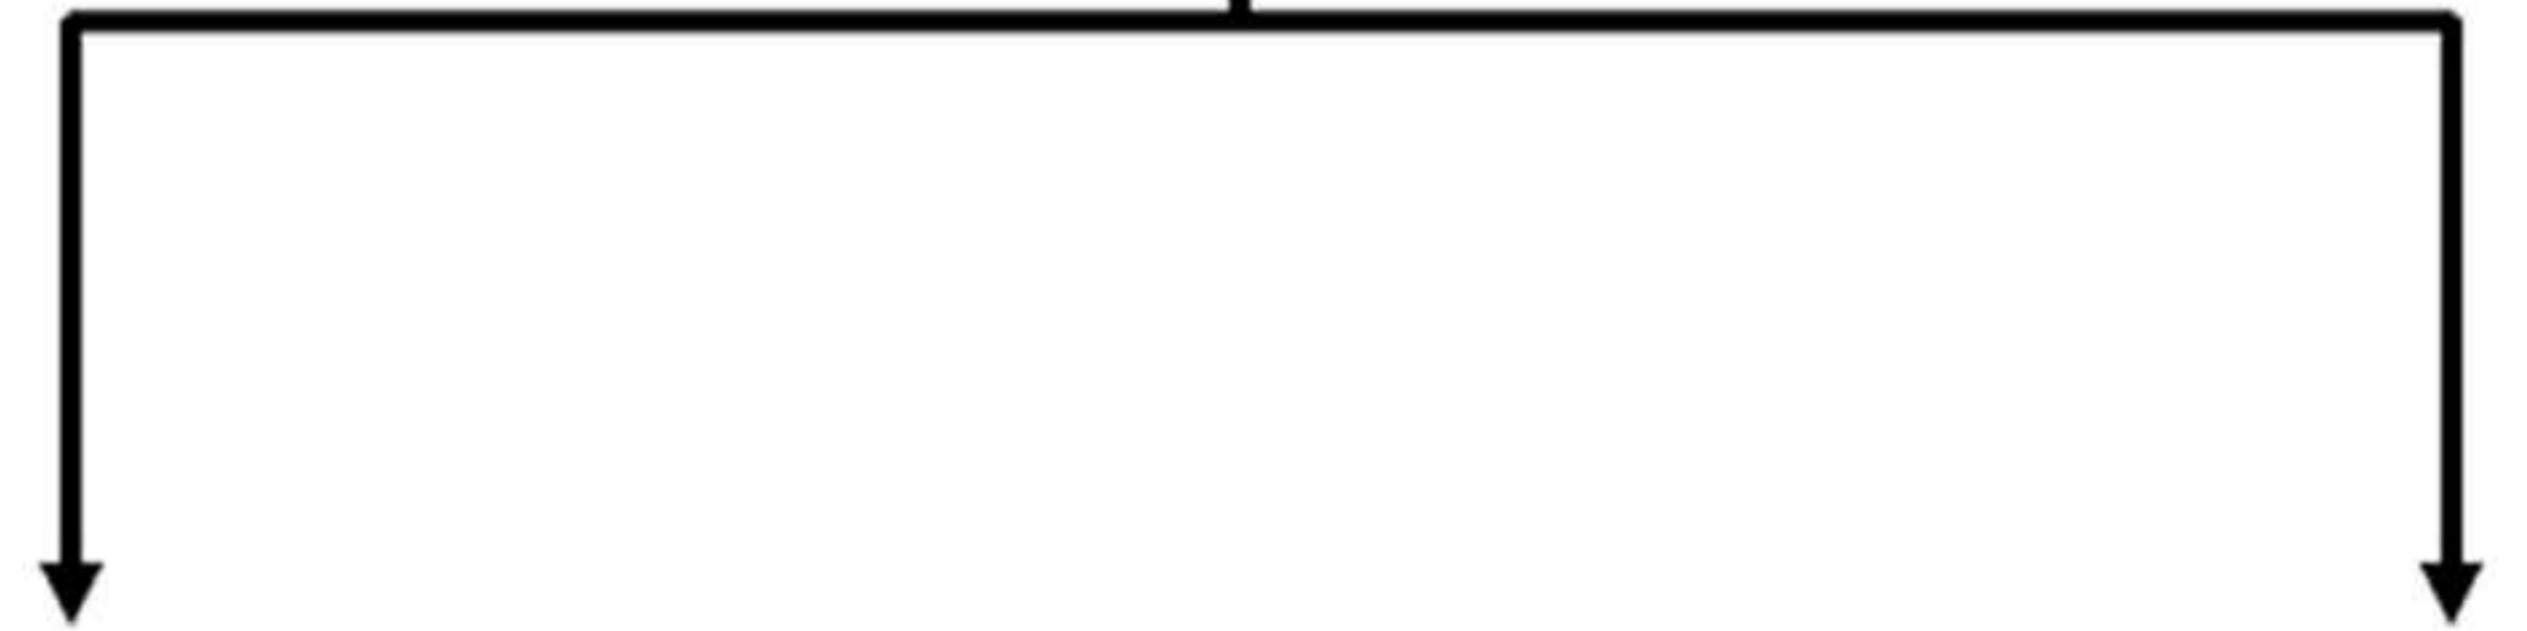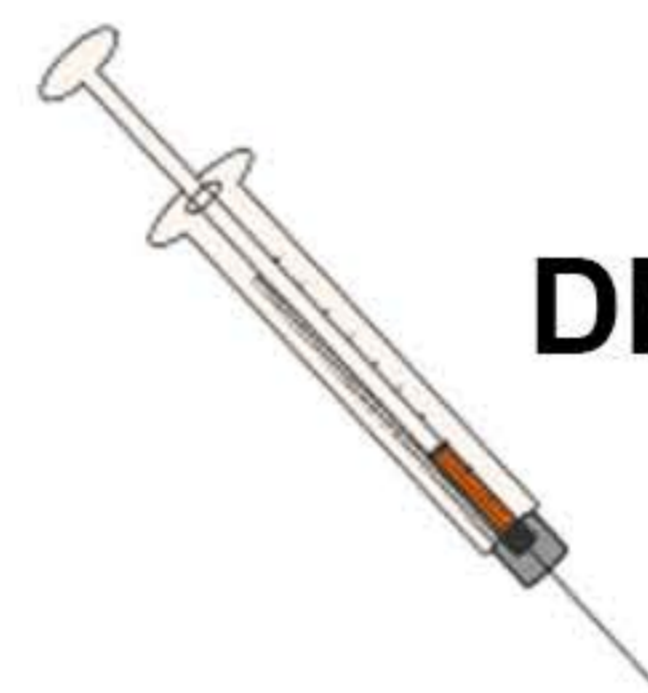

**DMSO**

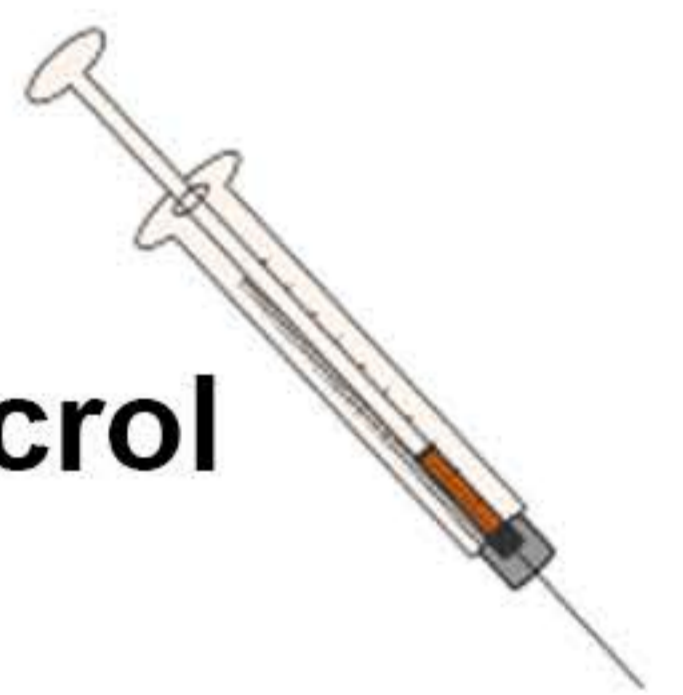

**Carvacrol**

**1 Weeks**

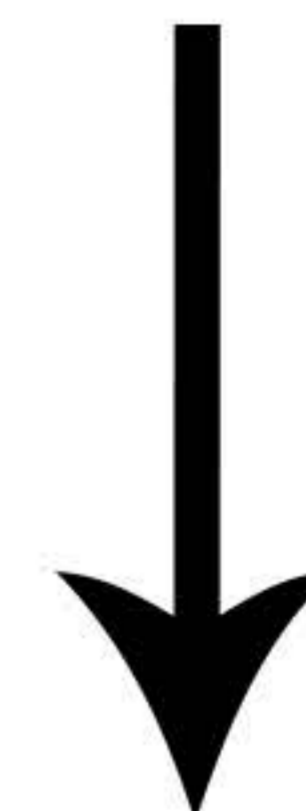

**PET/CT study**

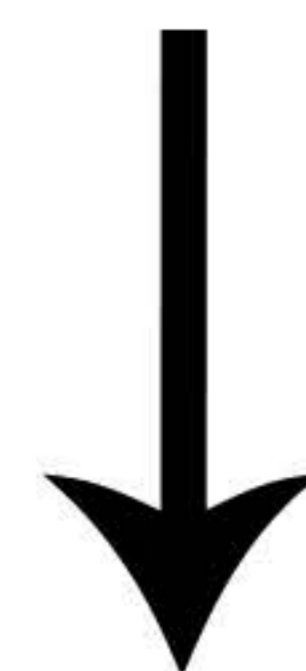

**Dissected, weighed and  
frozen the tumors**
