# Supplementary material for: TRPM7 silencing modulates glucose metabolic reprogramming to inhibit the growth of ovarian cancer by enhancing AMPK activation to promote HIF-1α degradation
Source: PubMed Central journal article supplement (PMC8802454; doi:10.1186/s13046-022-02252-1), 2022-01-31

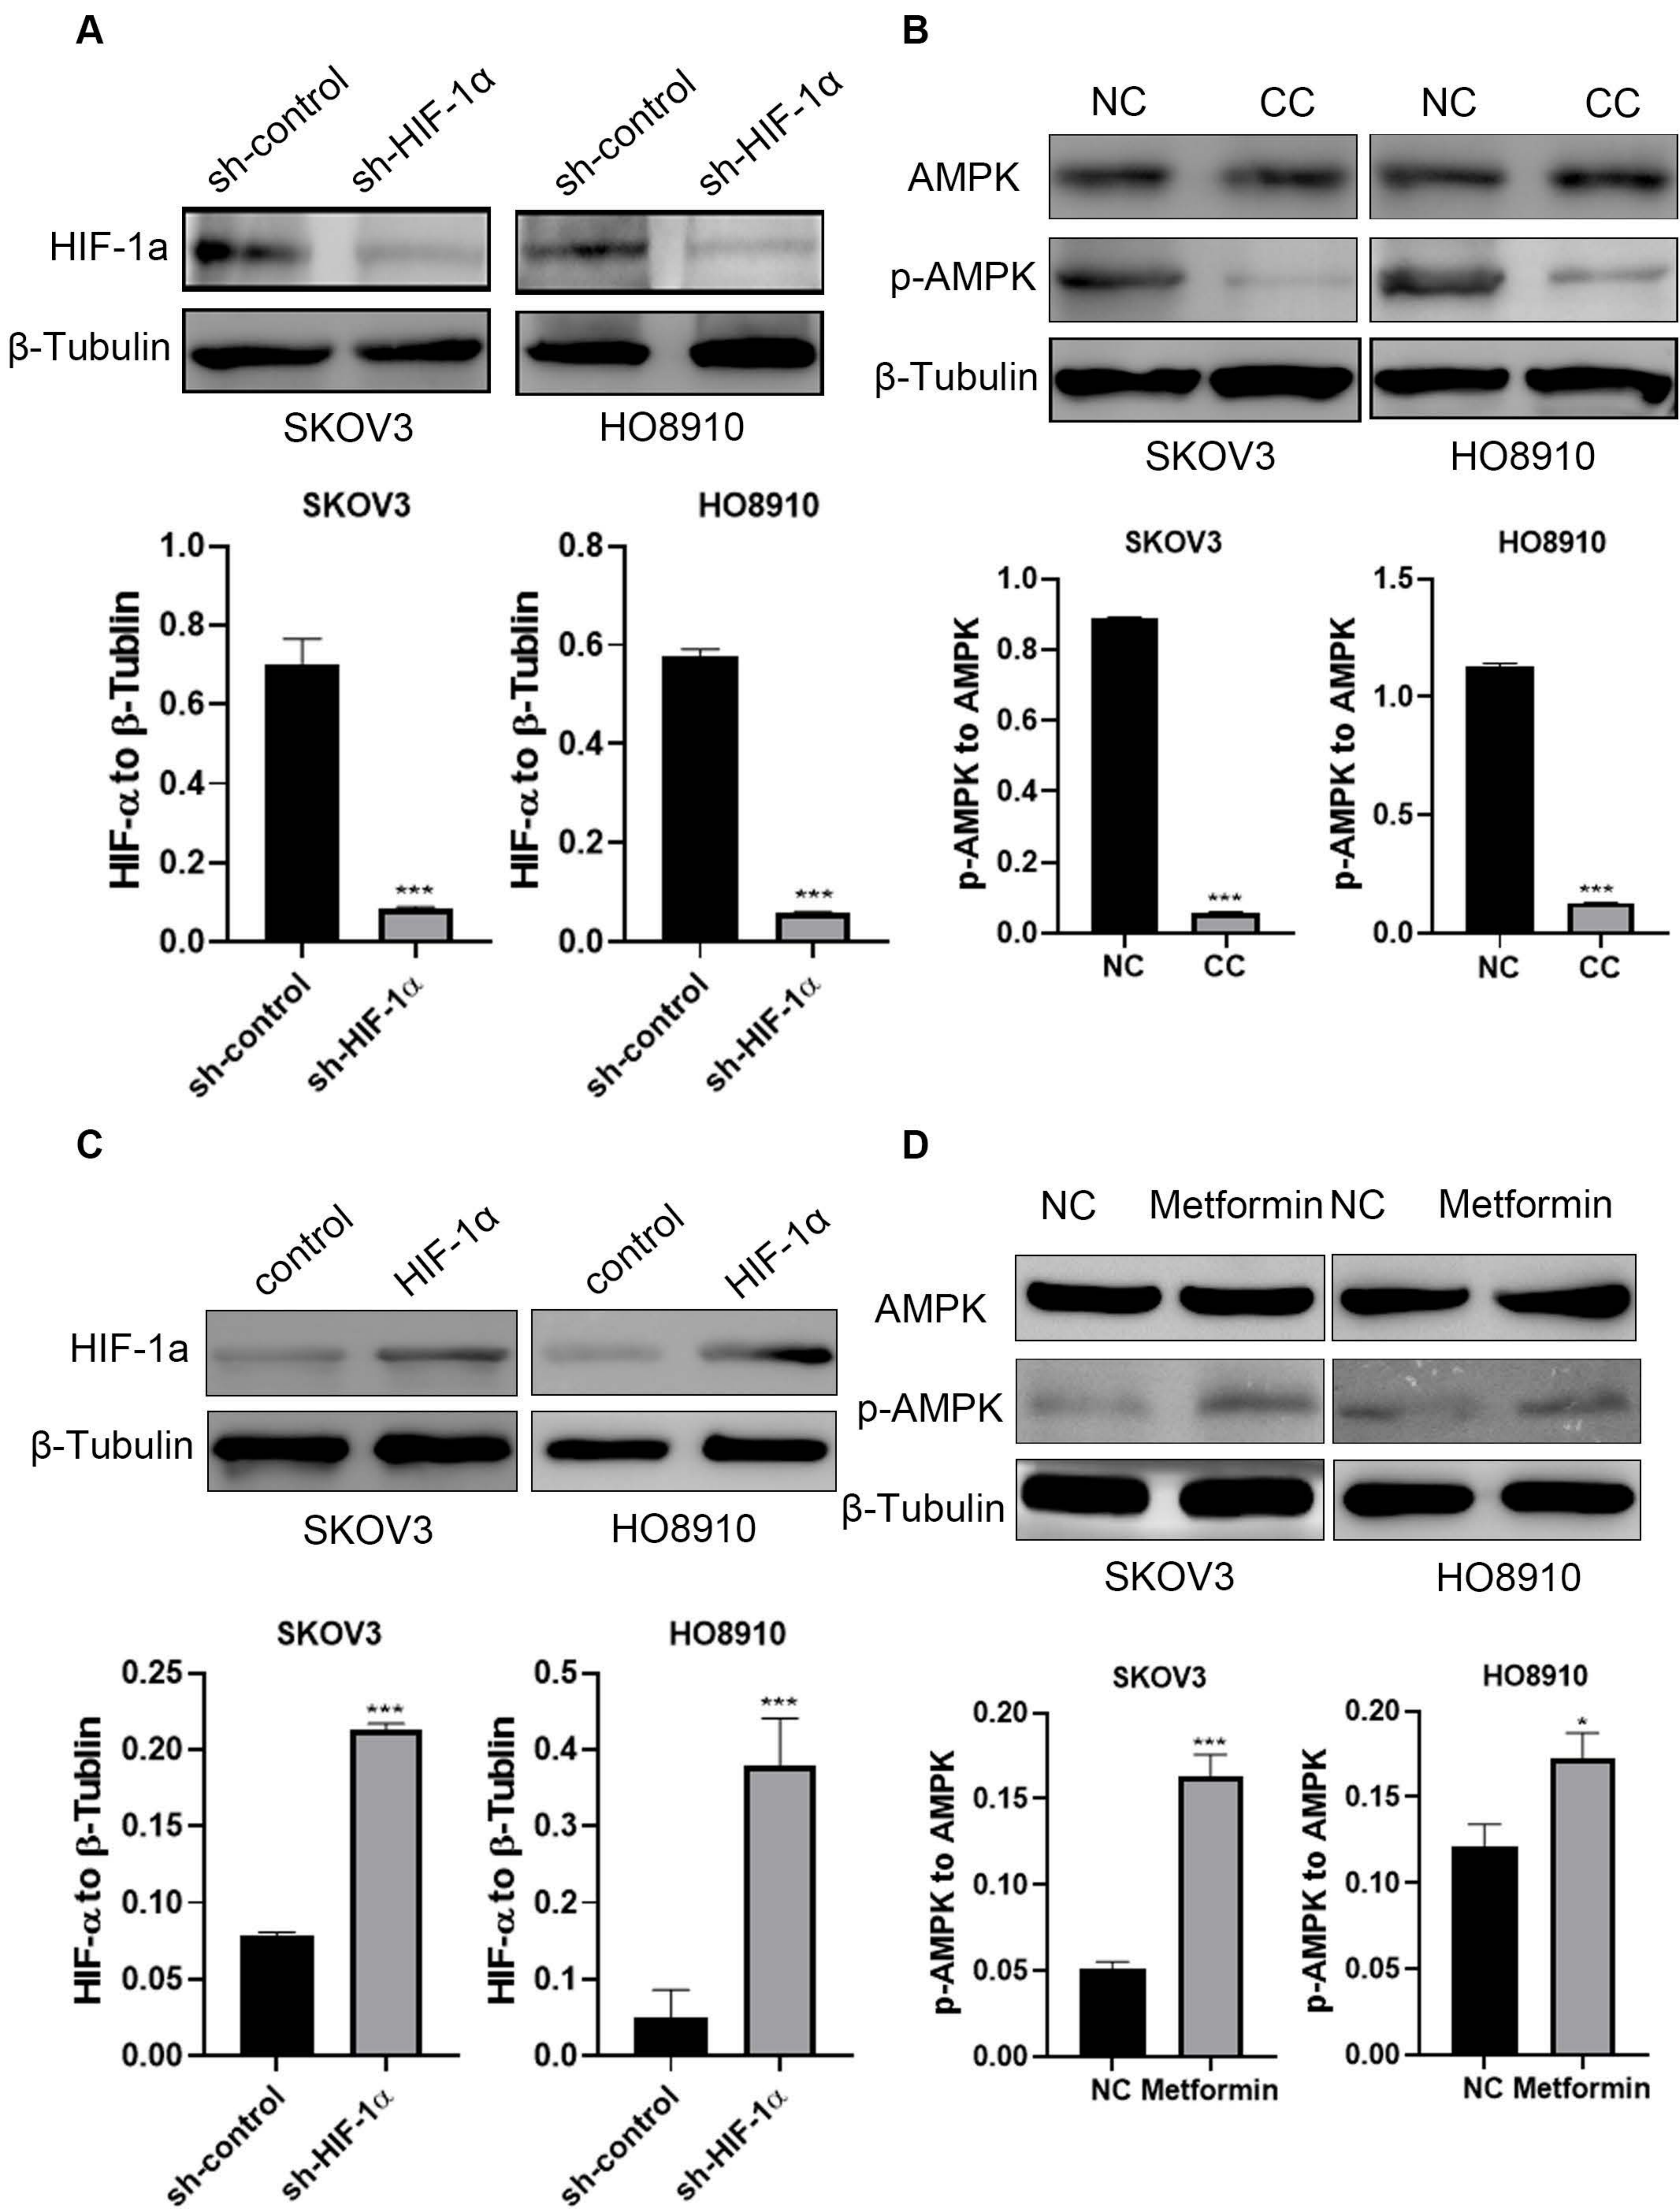

Supplement: 13046_2022_2252_MOESM9_ESM.pdf [file 13046_2022_2252_MOESM9_ESM.pdf]
